# Supplementary material
Source: PubMed Central journal article supplement (PMC5749529)
Supplement: jci-128-92390-s001.pdf [file jci-128-92390-s001.pdf]

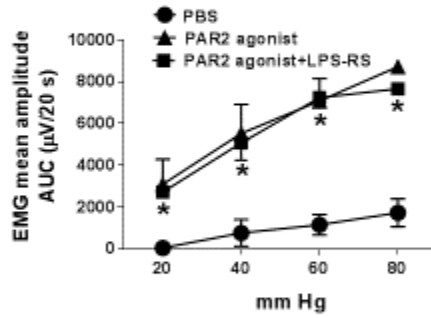

Supplementary Figure 1

**Supplementary Figure 1.** Intracolonic administration of LPS-RS (1 mg/kg) failed to block visceral hypersensitivity induced by the PAR2 agonist SLIGKV-NH2 (0.5 mg/kg; Tocris, Bristol, UK). \*Significantly different from PBS-treated rat ( $P < 0.05$ ).

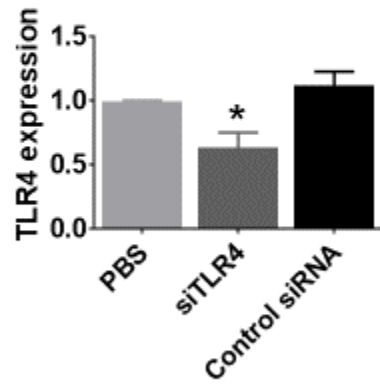

Supplementary Figure 2

**Supplementary Figure 2.** RT-PCR analysis shows that TLR4 gene expression in rat colon mucosa was significantly inhibited by treatment of siRNA targeting TLR4. \*Significantly different to PBS treated ( $P < 0.05$ ).

### Supplementary Table 1

High-FODMAP diet–induced colonic mucosal inflammation prevented by rifaximin

| <b>Cells/mm<sup>2</sup></b> | <b>RC</b> | <b>HFM</b> | <b>HFM+Rif</b> |
|-----------------------------|-----------|------------|----------------|
| Mononuclear cells           | 24.5±3.5  | 34.4±2.6*  | 15.2±4.6#      |
| Neutrophils                 | 40.9±4.6  | 60.5±6.8*  | 38.5±4.7#      |
| Eosinophils                 | 11.7±3.9  | 27.4±4.6*  | 16.3±3.0       |
| Mast cells                  | 5.8±2.1   | 14.3±3.1*  | 4.5±2.0#       |

n=6 in each group, \*, significantly different than RC (p<0.05); #, significantly different than HFM (p<0.05). RC, regular chow; HFM, high-FODMAP diet; Rif, rifaximin

### Supplementary Table 2

Low-FODMAP diet prevented restraint stress–induced inflammatory cell infiltration in the colonic mucosa

| <b>Cells/mm<sup>2</sup></b> | <b>Sham RS</b> | <b>RS</b> | <b>RS+LFM</b> |
|-----------------------------|----------------|-----------|---------------|
| Mononuclear cells           | 24.0±2.6       | 31.7±2.1* | 19.38±2.5#    |
| Neutrophils                 | 48.5±3.9       | 88.7±7.6* | 50.1±3.0#     |
| Eosinophils                 | 13.5±2.1       | 21.0±2.4* | 15.1±2.4      |
| Mast cells                  | 11.0±3.3       | 34.5±5.7* | 18.0±5.2#     |

n=6 in each group, \*, significantly different than sham RS as control (p<0.05); #, significantly different than RS (p<0.05). RS, restraint stress; LFM, low-FODMAP diet

### Supplementary Table 3

Low-FODMAP diet prevented water avoidance stress–induced inflammatory cell infiltration in the colonic mucosa

| <b>Cells/mm<sup>2</sup></b> | <b>Sham WAS</b> | <b>WAS</b> | <b>LFM+WAS</b> |
|-----------------------------|-----------------|------------|----------------|
| Mononuclear cells           | 18.7±3.4        | 37.4±6.4*  | 18.7±3.9#      |
| Neutrophils                 | 43.2±6.1        | 99.2±10.4* | 56.0±4.0#      |
| Eosinophils                 | 12.8±2.2        | 21.0±4.8   | 9.4±3.0        |
| Mast cells                  | 9.0±3.7         | 25.7±5.6*  | 7.0±1.8#       |

n=6 in each group, \*, significantly different than sham WAS (p<0.05); #, significantly different than WAS (p<0.05). WAS, water avoidance stress; LFM, low-FODMAP diet
